# Supplementary material for: Comparison of hepatic and serum lipid signatures in hepatocellular carcinoma patients leads to the discovery of diagnostic and prognostic biomarkers
Source: PubMed Central journal article supplement (PMC5797031; doi:10.18632/oncotarget.23494), 2017-12-13
Supplement: oncotarget-09-5032-s001.pdf [file oncotarget-09-5032-s001.pdf]

# Comparison of hepatic and serum lipid signatures in hepatocellular carcinoma patients leads to the discovery of diagnostic and prognostic biomarkers

## SUPPLEMENTARY MATERIALS

### Semi-quantitative analysis of PEp (36:4) and (40:6) in external validation set

Untargeted analysis is the most commonly used method for biomarker discovery by profiling the whole set of biological entities. Targeted analysis is a gold standard for absolutely quantitative analysis of target biomarkers using standards. In other words, the absolutely quantitative analysis of target biomarkers is restricted by the coverage of standards. Generally, it is not possible to obtain a standard for every single biomarker. When commercial standard is not available for target biomarker, semi-quantitative analysis is an alternative approach to be carried out, which assigns approximate measurements to data, rather than an exact measurement. In the validation study, we performed a semi-quantitative analysis of PEp (36:4) and (40:6) in 18 hepatocellular carcinoma patients, 20 liver cirrhosis patients and 20 healthy individuals because of no available standards, in which the precursor and product ion pairs (i.e., mass transitions) of the two lipids were defined from the MS/MS study in profiling analysis, the calibration curves were generated by the two lipids from real samples (1, 2).

### Chemicals and reagents

Acetonitrile, methanol, and chloroform were purchased from Merck. Ammonium formate and isopropyl alcohol were purchased from Fluka. Deionised water was purified “in-house” using a Milli-Q system Millipore. Lipid standard of PC (17:0/17:0) was purchased from Avanti Polar Lipids.

### Sample preparation

Serum (100  $\mu$ L) was diluted with 900  $\mu$ L of chloroform/methanol/water (2:1:1, v/v/v) containing 5  $\mu$ g/mL PC (17:0/17:0) as internal standard. The mixture was shaken vigorously for 5 min, and then centrifuged for 20 minutes at 20,187 g. The organic phase was collected and dried under nitrogen gas. The dry residues were reconstituted in 200  $\mu$ L chloroform/methanol (2:1, v/v) for LC-MS/MS analysis. The quality control (QC) sample was prepared by mixing an equal aliquot of each serum sample for linearity and repeatability testing, and also for the QC of real sample analysis. For the linearity test, the QC sample was aliquoted into 10, 20, 50, 100, 200, and 400  $\mu$ L, respectively, and triplicate samples for each volume of serum were prepared. These aliquots were prepared by the same method for real samples. For the repeatability test, 100  $\mu$ L QC sample were prepared using the same method for real samples, and 10 replicates were prepared.

### LC-MS/MS analysis

LC-MS/MS analysis was performed on an Agilent 1290 ultrahigh pressure liquid chromatography system (Waldbronn, Germany) coupled to a 6490 Triple Quadrupole mass spectrometer with iFunnel Technology. Chromatographic separation was achieved using a *phenomenex Kinetex C18* column (50  $\times$  2.1 mm, 2.6  $\mu$ m) with a flow rate of 0.40 mL/min at 40°C. Gradient conditions were as follows: 0–5 min, 60–85% A; 5–10 min, 85–100% A; 10–25 min, 100% A; 25–26 min, 100–60% A. The mobile phase A was methanol/acetonitrile/isopropyl alcohol (9:4:2, v/v/v) with 20mM HCOONH<sub>4</sub>, and B was water/isopropyl alcohol (13:2, v/v) with 20 mM HCOONH<sub>4</sub>. The injected sample volume was 10  $\mu$ L for each run. PEp (36:4) and (40:6) were ionized in negative mode with following source parameters: drying gas (N<sub>2</sub>) temperature 200°C with a flow of 14 L/min, nebulizer gas pressure 20 psi, sheath gas temperature 250°C with a flow of 11 L/min, capillary voltage 3,000 V and nozzle voltage 1500 V. Data were acquired in multiple reaction monitoring (MRM) mode (Supplementary Table 7).

### Method validation

The proposed method was validated for linearity and repeatability, but not for accuracy, precision and recovery because of no available standards (1). Briefly, calibration curve was constructed from three replicate measurements of six concentrations of PEp (36:4) and (40:6) in QCs. The method showed a good linearity, with  $r^2 > 0.99$ . The repeatability of their peak areas was calculated as relative standard deviations (RSD). We found that they had an RSD of < 10% among the 10 replicates, indicating the high repeatability of our method.

### REFERENCES

1. Chen S, Kong H, Lu X, Li Y, Yin P, Zeng Z, et al. Pseudotargeted metabolomics method and its application in serum biomarker discovery for hepatocellular carcinoma based on ultra high-performance liquid chromatography/triple quadrupole mass spectrometry. *Anal Chem.* 2013; 85:8326–33.
2. Shao Y, Zhu B, Zheng R, Zhao X, Yin P, Lu X, et al. Development of urinary pseudotargeted LC-MS-based metabolomics method and its application in hepatocellular carcinoma biomarker discovery. *J Proteome Res.* 2015; 14:906–16.

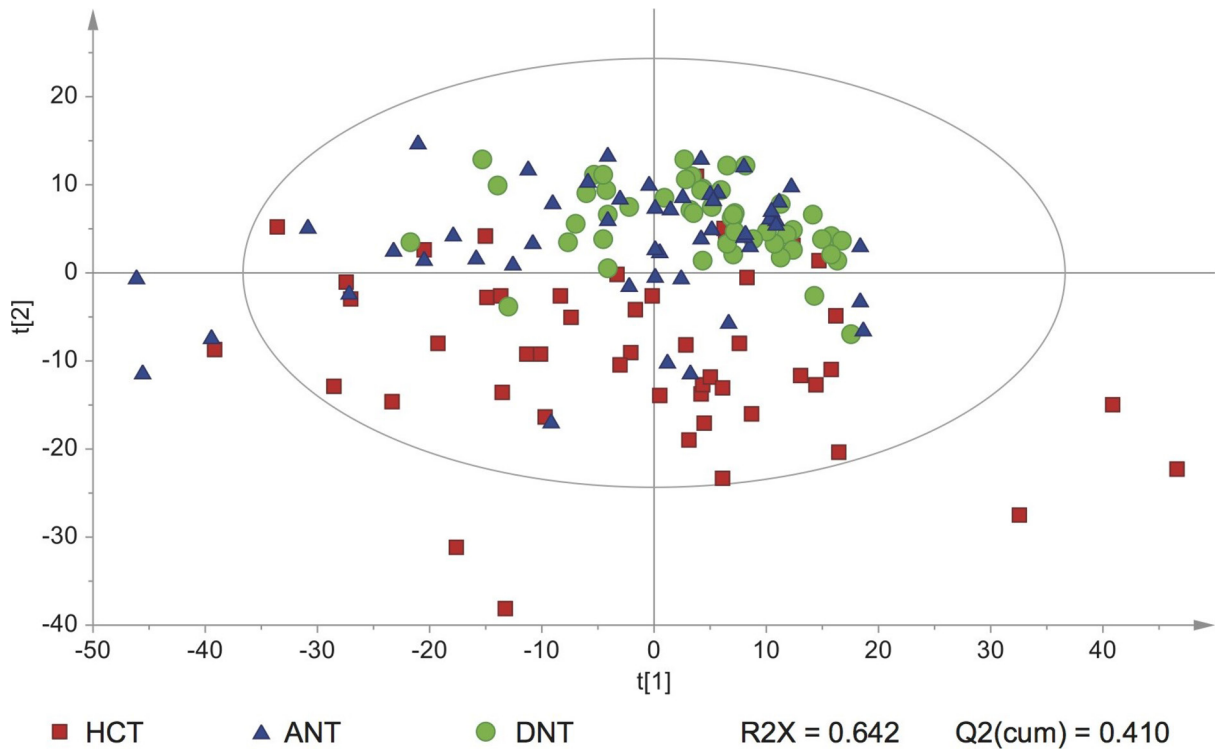

**Supplementary Figure 1: PCA score scatter plot shows lipid classification of three types of liver tissues.** HCT ( $n = 50$ ), ANT ( $n = 50$ ), DNT ( $n = 50$ ).

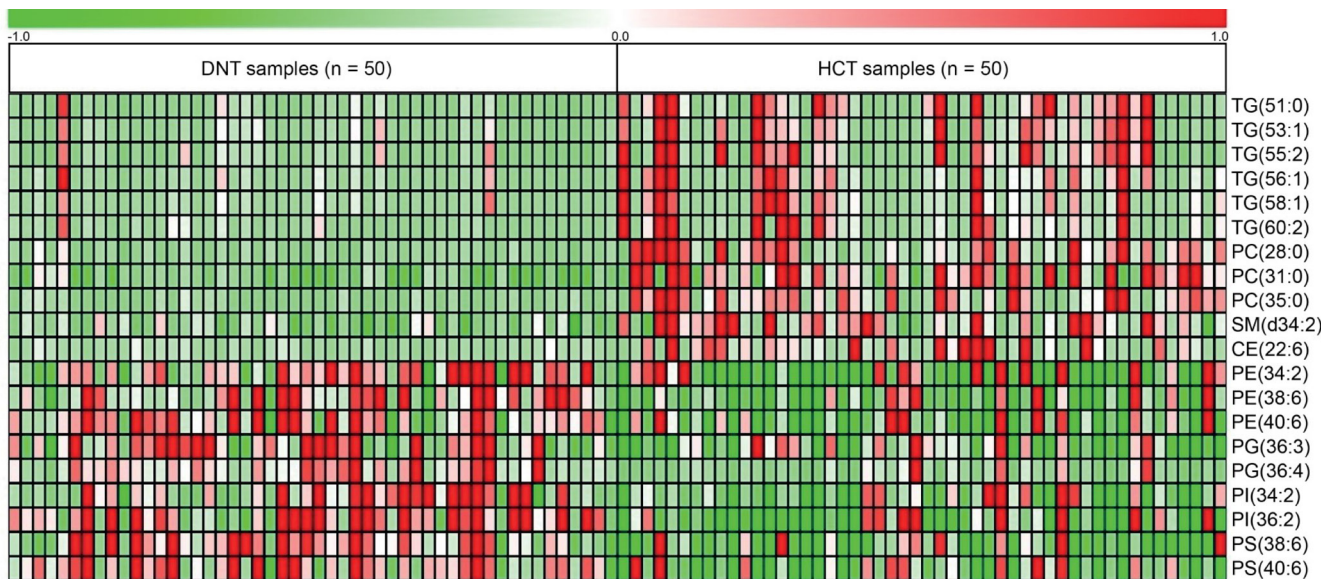

**Supplementary Figure 2: Heat map of 20 lipid signatures in DNT and HCT samples.** Each row shows peak area for a specific lipid after mean centering and unit variance scaling of the data. Each column shows the hepatic lipid profile of each subject.



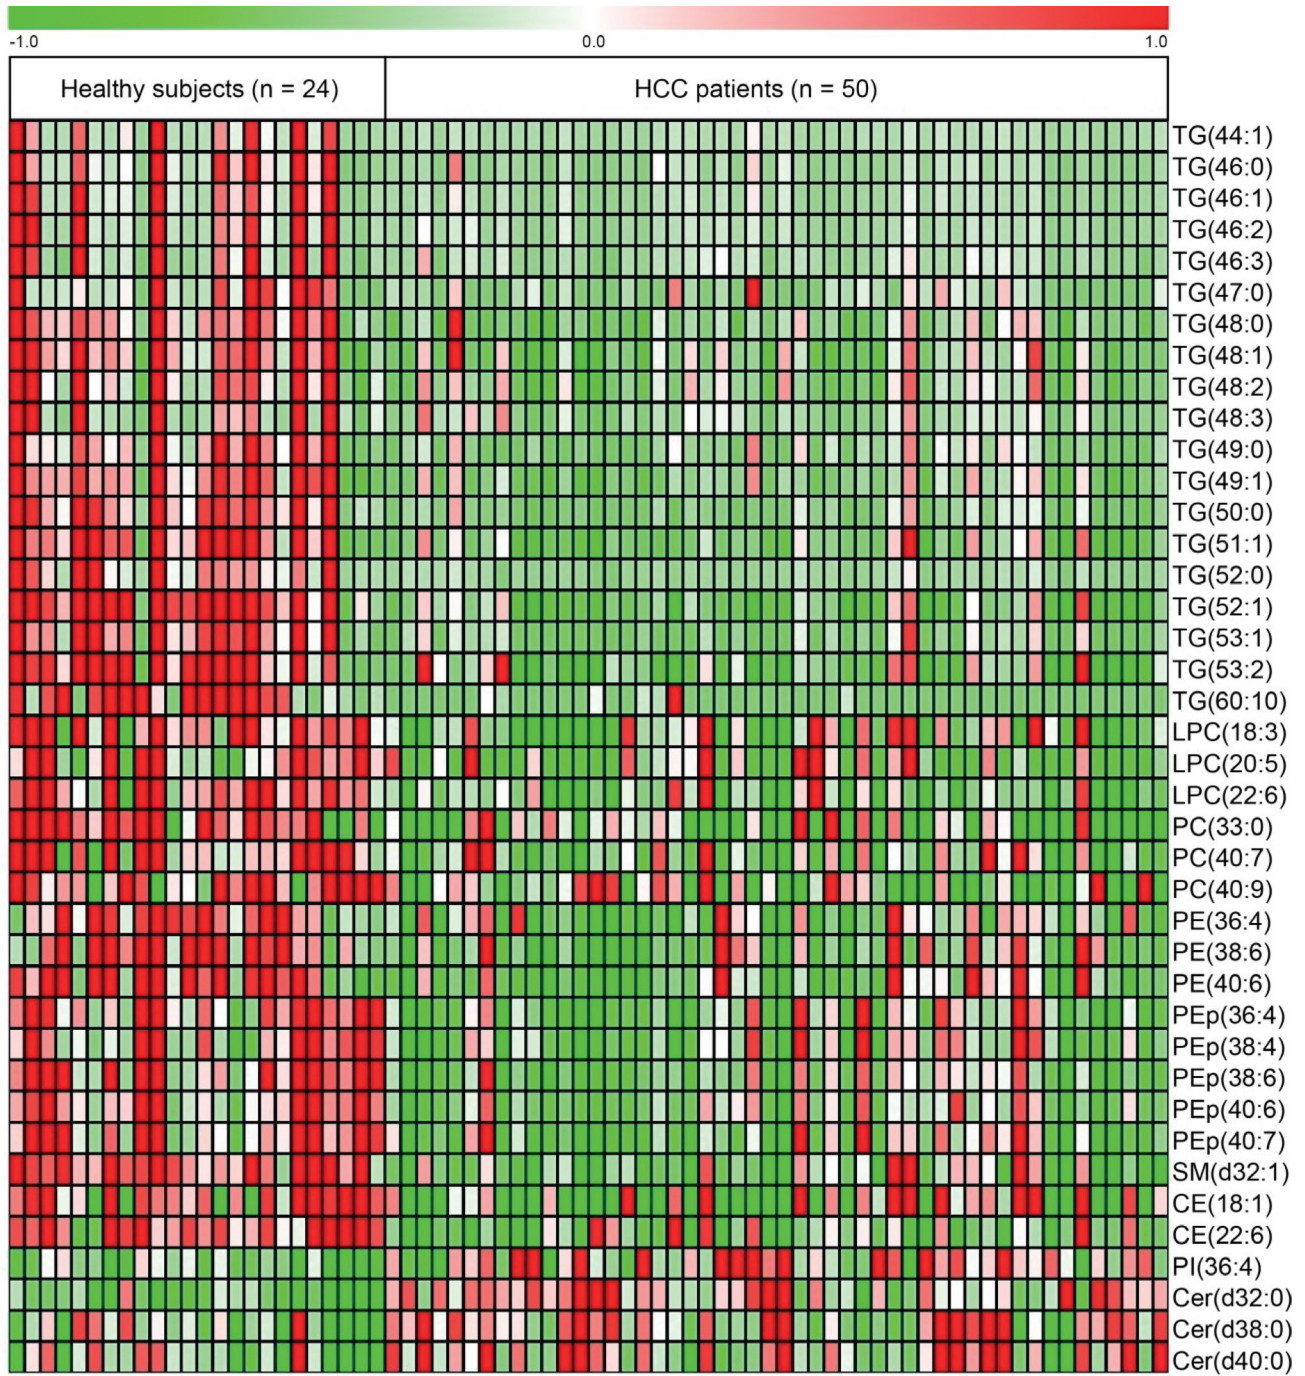

**Supplementary Figure 3: Heat map of 40 lipid signatures in serum of healthy subjects and HCC patients.** Each row shows peak area for a specific lipid after mean centering and unit variance scaling of the data. Each column shows the serum lipid profile of each subject.

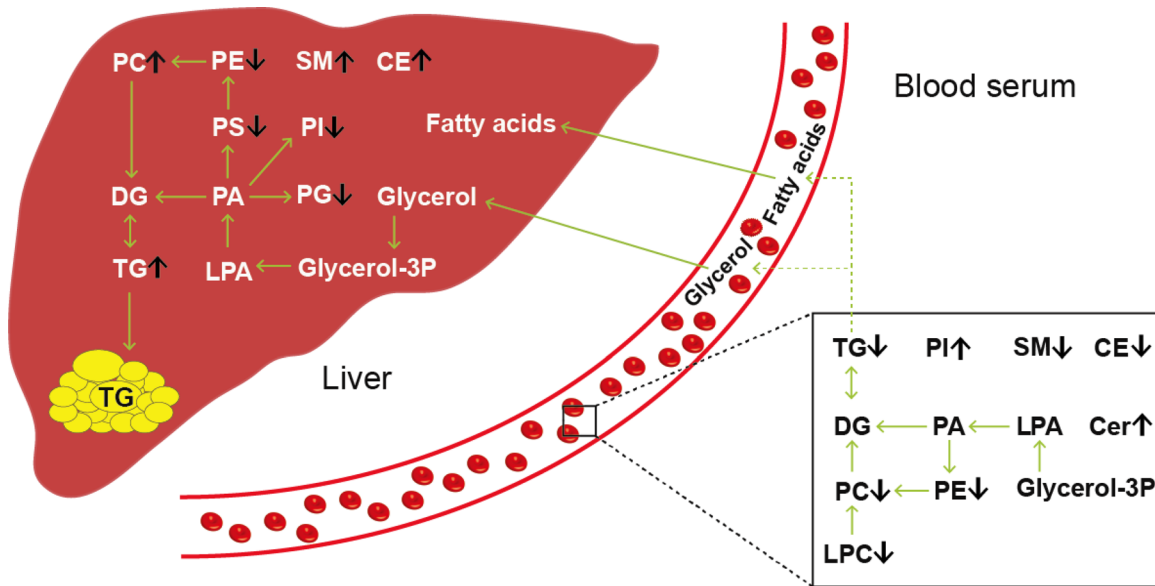

↑ Upregulated in HCC tumors compared to matched normal tissues, or upregulated in HCC sera compared to healthy controls.

↓ Downregulated in HCC tumors compared to matched normal tissues, or downregulated in HCC sera compared to healthy controls.

**Supplementary Figure 4: Differential lipids and pathways in liver and serum of HCC patients.** Glycerol-3P, Glycerol 3-phosphate.

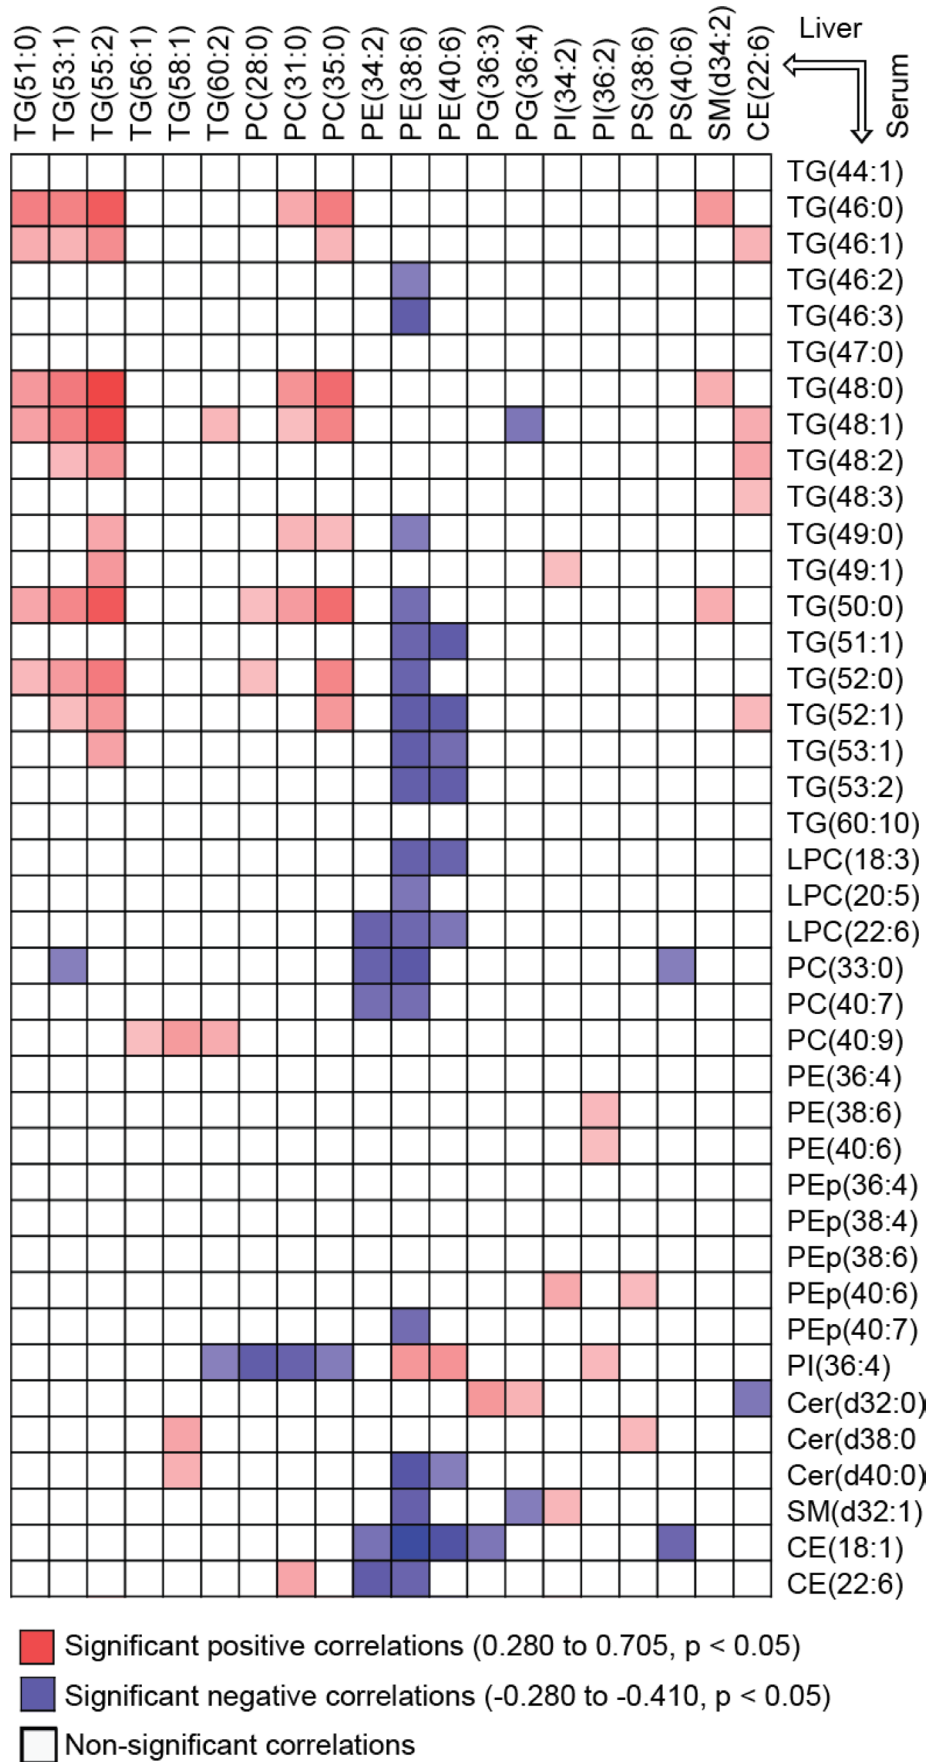

Supplementary Figure 5: Pearson correlation analysis of hepatic and serum lipid changes in HCC patients.

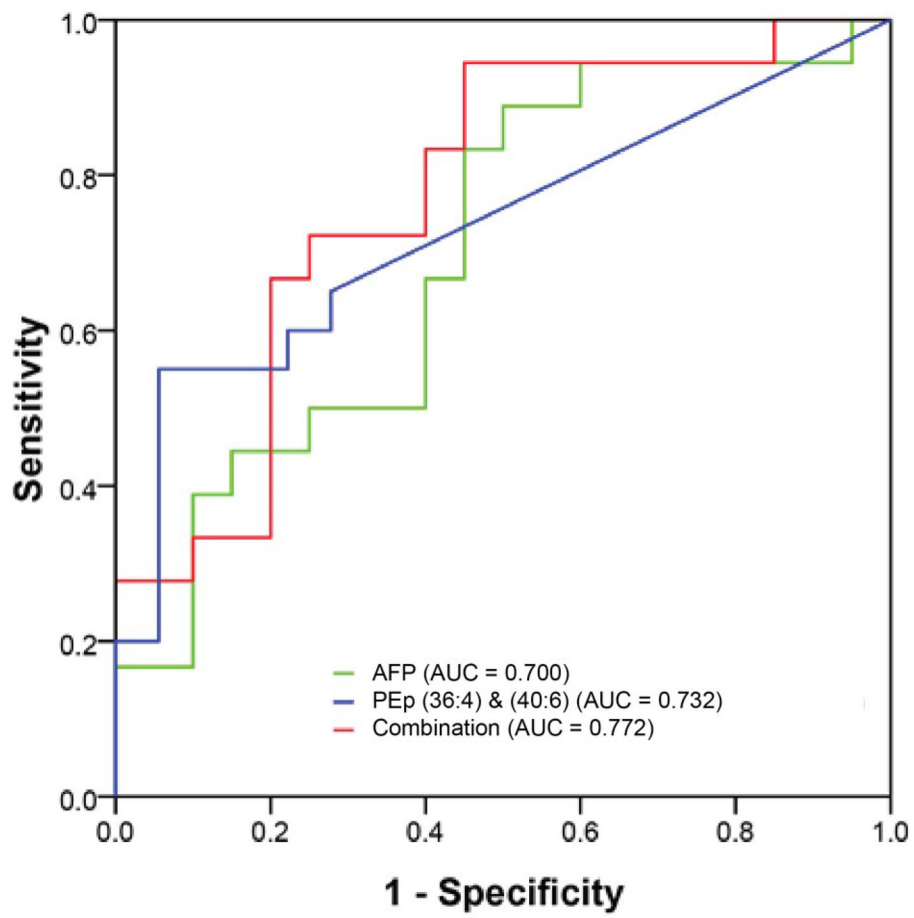

Supplementary Figure 6: ROC curve of the combination of PEp (36:4), (40:6) and AFP to predict HCC from liver cirrhosis patients in the validation set.

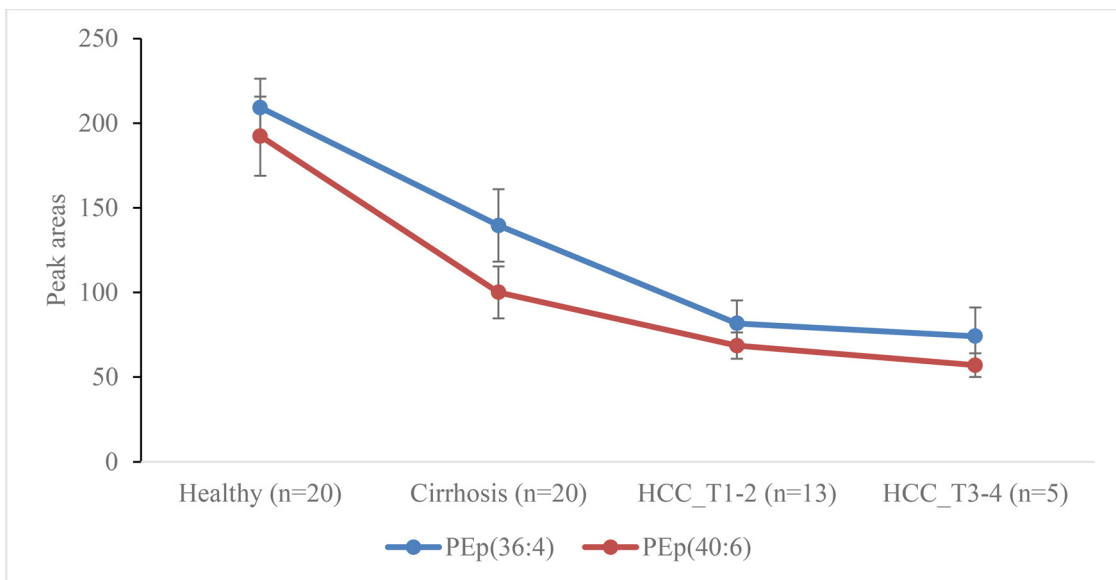

Supplementary Figure 7: Altered serum expressions of PEp (36:4) and (40:6) in the validation set.

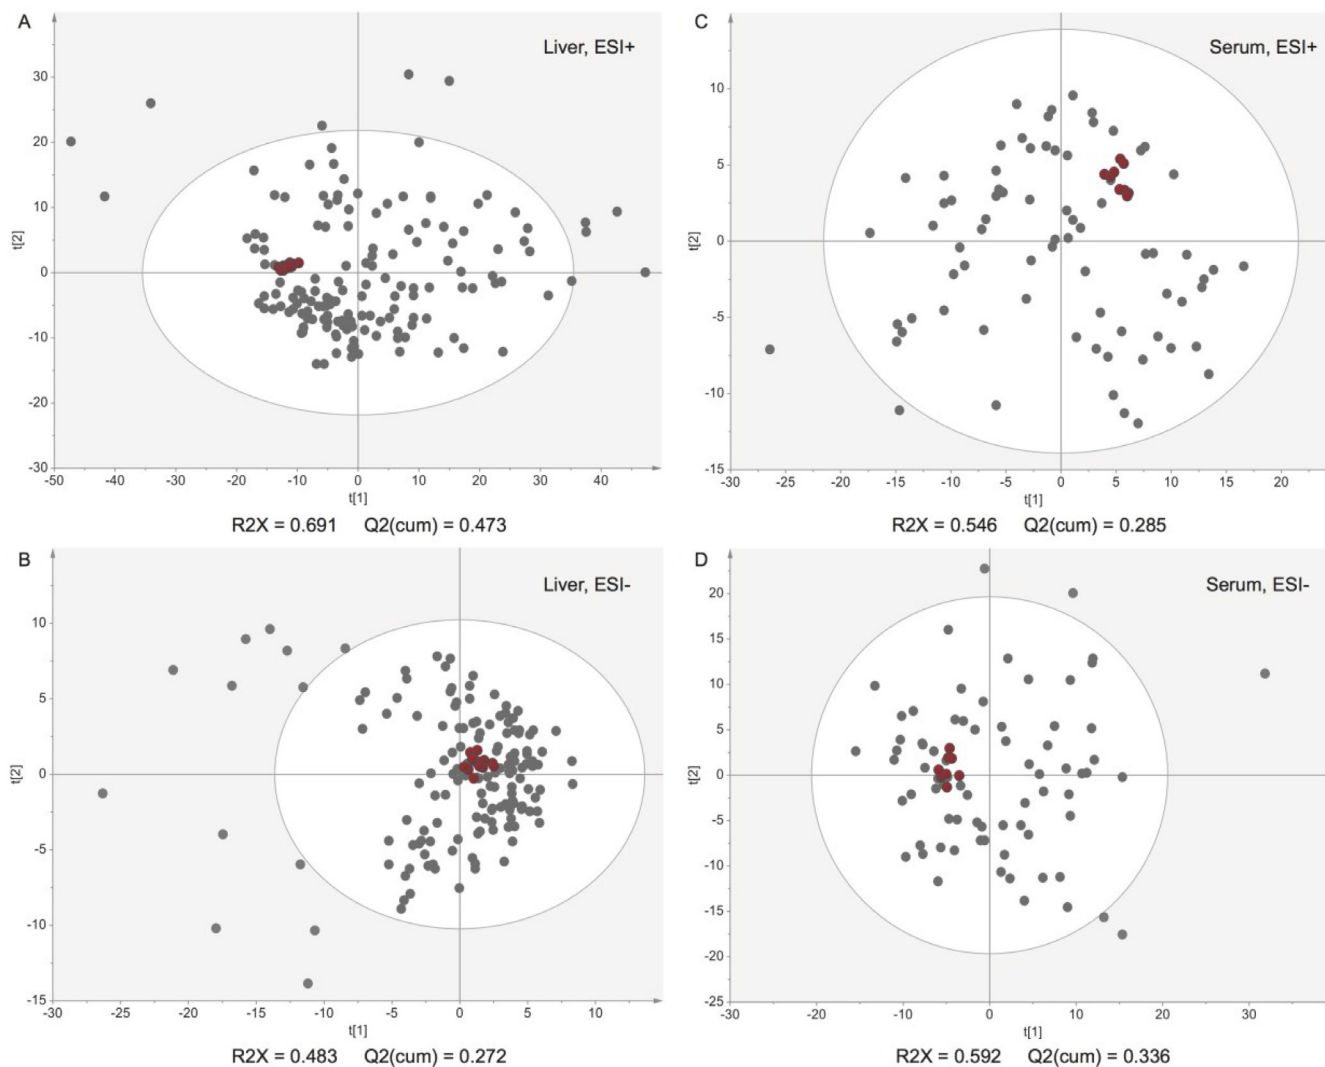

**Supplementary Figure 8: PCA scores plots of real (gray dots) and QC (red dots) samples. (A, B) tissue (gray dots,  $n = 150$ ) and QC (red dots,  $n = 16$ ) samples: (A) positive ion mode, (B) negative ion mode. (C, D) serum (gray dots,  $n = 74$ ) and QC (red dots,  $n = 9$ ) samples: (C) positive ion mode, (D) negative ion mode.**



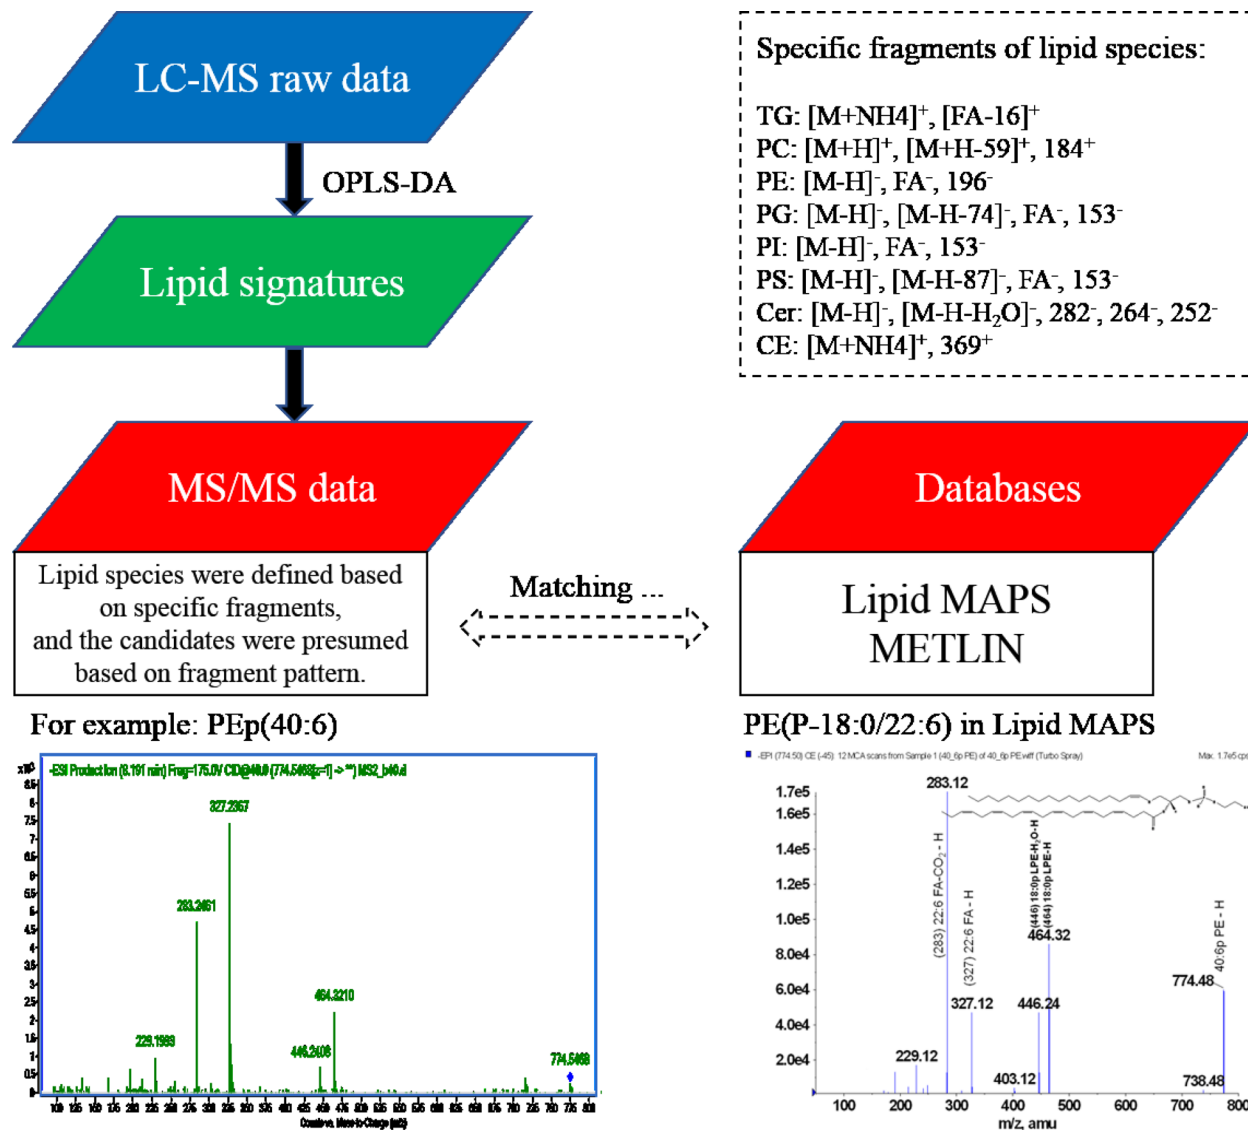

**Supplementary Figure 9: A workflow of manual identification of lipids used in this study.** TG: triglyceride; PC: phosphatidylcholine; PE: phosphatidylethanolamine; PG: phosphatidylglycerol; PI: phosphatidylinositol; PS: phosphatidylserine; Cer: ceramide; CE: cholesteryl ester; FA: fatty acid.



**Supplementary Table 1: Characteristics of 18 HCC patients, 20 liver cirrhosis patients, and 20 healthy individuals in the validation set**

| Characteristics <sup>a</sup> | HCC patients (n = 18) | Liver cirrhosis patients (n = 20) | Healthy individuals (n = 20) | P value <sup>b</sup> |
|------------------------------|-----------------------|-----------------------------------|------------------------------|----------------------|
| Gender (M/F)                 | 14/4                  | 13/7                              | 16/4                         | 0.508                |
| Age (year)                   | 60 (43~79)            | 59 (38~78)                        | 61 (28~69)                   | 0.770                |
| AFP (ng/mL)                  | 7.7 (1.6~1210)        | 3.0 (1.4~147)                     | -                            | 0.028                |
| ALT (U/L)                    | 43.5 (29~171)         | 42.5 (18~495)                     | -                            | 0.851                |
| AST (U/L)                    | 51.5 (24~181)         | 57.0 (14~221)                     | -                            | 0.942                |
| GGT (U/L)                    | 111.9 (24.4~336)      | 105.9 (15.8~221)                  | -                            | 0.919                |
| HBsAg (positive/negative)    | 15/3                  | 14/6                              | 0/24                         | 0.454*               |
| HCV Ab (positive/negative)   | 3/15                  | 6/14                              | -                            | 0.454*               |
| Cirrhosis/no cirrhosis       | 11/7                  | 20/0                              | 0/24                         |                      |
| TNM stages                   |                       |                                   |                              |                      |
| T1N0M0 (early-stage)         | 12                    |                                   |                              |                      |
| T2N0M0 (early-stage)         | 1                     |                                   |                              |                      |
| T3N0M0 (late-stage)          | 4                     |                                   |                              |                      |
| T4N0M0 (late-stage)          | 1                     |                                   |                              |                      |

<sup>a</sup> Age, AFP, ALT, AST, and GGT were expressed as median (range).

<sup>b</sup> Chi-squared test was conducted for gender, HBsAg and HCV Ab differences, one-way ANOVA was for age differences, and Student's *t*-test was conducted for AFP, ALT, AST, and GGT differences. \* The *p* values are obtained by comparison between HCC and liver cirrhosis patients.

**Supplementary Table 2: Characteristics of 50 HCC patients stratified by liver cirrhosis status**

| Characteristics <sup>a</sup> | HCC patients with liver cirrhosis | HCC patients without liver cirrhosis | P values <sup>b</sup> |
|------------------------------|-----------------------------------|--------------------------------------|-----------------------|
| No. of subjects              | 29                                | 21                                   |                       |
| Gender (M/F)                 | 23/6                              | 15/6                                 | 0.738                 |
| Age (year)                   | 53 (34~72)                        | 53 (35~68)                           | 0.317                 |
| AFP (mg/L)                   | 49.5 (1.62~24200)                 | 15.5 (3.7~628.6)                     | 0.010                 |
| ALT (U/L)                    | 47 (17~444)                       | 94 (22~695)                          | 0.073                 |
| AST (U/L)                    | 54 (20~271)                       | 73 (21~903)                          | 0.072                 |
| GGT (U/L)                    | 95 (11~305)                       | 61 (17~647)                          | 0.643                 |
| HBsAg (positive/negative)    | 28/1                              | 18/3                                 |                       |
| HCVAb (positive/negative)    | 0/29                              | 1/20                                 |                       |
| TNM stages                   |                                   |                                      |                       |
| T1N0M0 (early-stage)         | 7                                 | 5                                    |                       |
| T2N0M0 (early-stage)         | 11                                | 8                                    |                       |
| T3N0M0 (late-stage)          | 9                                 | 1                                    |                       |
| T4N0M0 (late-stage)          | 2                                 | 7                                    |                       |

<sup>a</sup> Age, AFP, ALT, AST, and GGT were expressed as median (range). Limitation on the number of subjects, T1 and T2 were set as early-stage of HCC; T3 and T4 were set as late-stage of HCC.

<sup>b</sup> Chi-square test for gender, and Student's *t*-test for other continuous variables.

**Supplementary Table 3: Levels (peak areas) of 20 lipid signatures in HCC tumors stratified by cirrhosis status**

| <b>Lipids</b>               | <b>Candidates</b>         | <b>HCC patients<br/>without liver cirrhosis (<i>n</i> = 21)</b> | <b>HCC patients<br/>with liver cirrhosis (<i>n</i> = 29)</b> | <b><i>P</i> values <sup>a</sup></b> |
|-----------------------------|---------------------------|-----------------------------------------------------------------|--------------------------------------------------------------|-------------------------------------|
| <b>Glycerolipids</b>        |                           |                                                                 |                                                              |                                     |
| TG(51:0)                    | TG(16:0/17:0/18:0) [iso6] | 24.98 ± 6.03                                                    | 44.67 ± 15.51                                                | 0.247                               |
| TG(53:1)                    | TG(16:0/18:1/19:0) [iso6] | 65.97 ± 17.75                                                   | 103.08 ± 40.15                                               | 0.405                               |
| TG(55:2)                    | TG(15:0/18:1/22:1) [iso6] | 36.39 ± 10.58                                                   | 53.54 ± 18.00                                                | 0.417                               |
| TG(56:1)                    | TG(16:0/18:1/22:0) [iso6] | 53.15 ± 12.48                                                   | 163.03 ± 57.59                                               | 0.076                               |
| TG(58:1)                    | TG(16:0/18:1/24:0) [iso6] | 30.89 ± 9.92                                                    | 114.74 ± 39.64                                               | 0.052                               |
| TG(60:2)                    | TG(16:0/18:1/26:1) [iso6] | 32.33 ± 14.21                                                   | 75.22 ± 24.13                                                | 0.135                               |
| <b>Glycerophospholipids</b> |                           |                                                                 |                                                              |                                     |
| PC(28:0)                    | PC(14:0/14:0)             | 10.30 ± 1.38                                                    | 21.18 ± 7.09                                                 | 0.147                               |
| PC(31:0)                    | PC(15:0/16:0) [iso2]      | 8.68 ± 1.52                                                     | 9.63 ± 2.37                                                  | 0.738                               |
| PC(35:0)                    | PC(17:0/18:0) [iso2]      | 6.26 ± 1.24                                                     | 12.70 ± 4.29                                                 | 0.163                               |
| PE(34:2)                    | PE(16:0/18:2) [iso2]      | 856.56 ± 172.28                                                 | 536.28 ± 161.61                                              | 0.182                               |
| PE(38:6)                    | PE(16:0/22:6) [iso2]      | 1527.88 ± 318.02                                                | 763.10 ± 158.95                                              | 0.038                               |
| PE(40:6)                    | PE(18:0/22:6) [iso2]      | 809.98 ± 128.02                                                 | 544.56 ± 102.39                                              | 0.112                               |
| PG(36:3)                    | PG(18:1/18:2) [iso2]      | 873.24 ± 127.51                                                 | 811.63 ± 140.54                                              | 0.747                               |
| PG(36:4)                    | PG(18:2/18:2)             | 118.12 ± 29.14                                                  | 49.46 ± 12.13                                                | 0.036                               |
| PI(34:2)                    | PI(16:0/18:2) [iso2]      | 511.13 ± 81.34                                                  | 316.20 ± 44.44                                               | 0.042                               |
| PI(36:2)                    | PI(18:0/18:2) [iso2]      | 317.18 ± 50.24                                                  | 172.01 ± 31.93                                               | 0.019                               |
| PS(38:6)                    | PS(16:0/22:6) [iso2]      | 63.84 ± 16.78                                                   | 44.33 ± 15.23                                                | 0.394                               |
| PS(40:6)                    | PS(18:0/22:6) [iso2]      | 206.21 ± 31.82                                                  | 175.13 ± 46.10                                               | 0.582                               |
| <b>Sphingolipids</b>        |                           |                                                                 |                                                              |                                     |
| SM(d34:2)                   | SM(d18:1/16:1)            | 64.54 ± 5.76                                                    | 107.60 ± 18.44                                               | 0.036                               |
| <b>Sterol lipids</b>        |                           |                                                                 |                                                              |                                     |
| CE(22:6)                    |                           | 3.50 ± 0.88                                                     | 5.30 ± 2.47                                                  | 0.500                               |

<sup>a</sup> Student's *t*-test

**Supplementary Table 4: Levels (peak areas) of 40 lipid signatures in HCC serum stratified by cirrhosis status**

| Lipids                      | Candidates                | HCC patients without liver cirrhosis ( <i>n</i> = 21) | HCC patients with liver cirrhosis ( <i>n</i> = 29) | <i>P</i> values <sup>a</sup> |
|-----------------------------|---------------------------|-------------------------------------------------------|----------------------------------------------------|------------------------------|
| <b>Glycerolipids</b>        |                           |                                                       |                                                    |                              |
| TG(44:1)                    | TG(12:0/14:0/18:1) [iso6] | 0.78 ± 0.63                                           | 0.63 ± 0.44                                        | 0.311                        |
| TG(46:0)                    | TG(12:0/16:0/18:0) [iso6] | 1.97 ± 1.02                                           | 2.00 ± 1.67                                        | 0.945                        |
| TG(46:1)                    | TG(12:0/16:0/18:1) [iso6] | 3.45 ± 1.94                                           | 3.44 ± 2.16                                        | 0.988                        |
| TG(46:2)                    | TG(12:0/16:0/18:2) [iso6] | 2.50 ± 1.22                                           | 2.64 ± 1.59                                        | 0.738                        |
| TG(46:3)                    | TG(12:0/16:0/18:3) [iso6] | 1.32 ± 0.76                                           | 1.22 ± 0.92                                        | 0.689                        |
| TG(47:0)                    | TG(15:0/16:0/16:0) [iso3] | 0.44 ± 0.61                                           | 0.31 ± 0.35                                        | 0.355                        |
| TG(48:0)                    | TG(16:0/16:0/16:0)        | 9.13 ± 4.06                                           | 7.25 ± 4.75                                        | 0.150                        |
| TG(48:1)                    | TG(14:0/16:0/18:1) [iso6] | 21.32 ± 9.11                                          | 19.16 ± 10.65                                      | 0.457                        |
| TG(48:2)                    | TG(14:0/16:0/18:2) [iso6] | 18.87 ± 8.56                                          | 17.3 ± 8.72                                        | 0.529                        |
| TG(48:3)                    | TG(14:0/16:1/18:2) [iso6] | 5.15 ± 2.82                                           | 5.80 ± 4.11                                        | 0.538                        |
| TG(49:0)                    | TG(16:0/16:0/17:0) [iso3] | 0.72 ± 0.74                                           | 0.42 ± 0.52                                        | 0.092                        |
| TG(49:1)                    | TG(16:0/16:1/17:0) [iso6] | 4.11 ± 1.79                                           | 3.39 ± 1.54                                        | 0.134                        |
| TG(50:0)                    | TG(16:0/16:0/18:0) [iso3] | 8.52 ± 5.45                                           | 7.08 ± 4.57                                        | 0.317                        |
| TG(51:1)                    | TG(16:0/17:0/18:1) [iso6] | 6.36 ± 3.79                                           | 5.36 ± 2.56                                        | 0.274                        |
| TG(52:0)                    | TG(16:0/18:0/18:0) [iso3] | 1.74 ± 1.13                                           | 1.46 ± 0.84                                        | 0.330                        |
| TG(52:1)                    | TG(16:0/18:0/18:1) [iso3] | 57.16 ± 31.95                                         | 57.94 ± 22.75                                      | 0.921                        |
| TG(53:1)                    | TG(17:0/18:0/18:1) [iso6] | 0.70 ± 0.94                                           | 0.49 ± 0.62                                        | 0.327                        |
| TG(53:2)                    | TG(17:0/18:1/18:1) [iso3] | 11.60 ± 6.66                                          | 12.03 ± 6.68                                       | 0.822                        |
| TG(60:10)                   | TG(18:0/20:4/22:6) [iso6] | 0.08 ± 0.07                                           | 0.32 ± 0.75                                        | 0.158                        |
| <b>Glycerophospholipids</b> |                           |                                                       |                                                    |                              |
| LPC(18:3)                   |                           | 12.05 ± 7.73                                          | 10.59 ± 7.94                                       | 0.520                        |
| LPC(20:5)                   |                           | 1.62 ± 2.77                                           | 1.58 ± 2.06                                        | 0.949                        |
| LPC(22:6)                   |                           | 2.09 ± 3.31                                           | 2.28 ± 2.03                                        | 0.809                        |
| PC(33:0)                    | PC(15:0/18:0) [iso2]      | 0.74 ± 1.01                                           | 1.07 ± 1.09                                        | 0.273                        |
| PC(40:7)                    | PC(18:1/22:6) [iso2]      | 2.99 ± 1.56                                           | 3.20 ± 1.70                                        | 0.654                        |
| PC(40:9)                    | PC(18:3/22:6) [iso2]      | 0.54 ± 0.61                                           | 0.85 ± 0.60                                        | 0.081                        |
| PE(36:4)                    | PE(16:0/20:4) [iso2]      | 134.50 ± 81.77                                        | 99.95 ± 60.60                                      | 0.093                        |
| PE(38:6)                    | PE(16:0/22:6) [iso2]      | 268.83 ± 154.31                                       | 172.13 ± 103.38                                    | 0.011                        |
| PE(40:6)                    | PE(18:0/22:6) [iso2]      | 123.51 ± 73.94                                        | 79.10 ± 43.81                                      | 0.011                        |
| PEp(36:4)                   | PE(P-16:0/20:4)           | 329.15 ± 208.77                                       | 193.66 ± 129.94                                    | 0.007                        |
| PEp(38:4)                   | PE(P-18:0/20:4)           | 473.41 ± 273.53                                       | 287.98 ± 174.79                                    | 0.005                        |
| PEp(38:6)                   | PE(P-16:0/22:6)           | 218.28 ± 117.11                                       | 149.71 ± 99.25                                     | 0.030                        |
| PEp(40:6)                   | PE(P-18:0/22:6)           | 177.35 ± 105.90                                       | 123.17 ± 80.93                                     | 0.046                        |
| PEp(40:7)                   | PE(P-18:1/22:6)           | 121.55 ± 89.00                                        | 83.69 ± 69.81                                      | 0.099                        |
| PI(36:4)                    | PI(18:2/18:2)             | 84.82 ± 42.87                                         | 67.16 ± 32.22                                      | 0.103                        |
| <b>Sphingolipids</b>        |                           |                                                       |                                                    |                              |
| <b>Cer(d32:0)</b>           | Cer(d18:0/14:0)           | 18.92 ± 11.65                                         | 19.89 ± 5.21                                       | 0.693                        |
| <b>Cer(d38:0)</b>           | Cer(d18:0/20:0)           | 0.94 ± 0.38                                           | 0.99 ± 0.24                                        | 0.535                        |
| <b>Cer(d40:0)</b>           | Cer(d18:0/22:0)           | 1.16 ± 0.42                                           | 1.16 ± 0.29                                        | 0.941                        |
| <b>SM(d42:1)</b>            | SM(d18:1/14:0)            | 19.63 ± 9.54                                          | 16.75 ± 6.06                                       | 0.200                        |
| <b>Sterol lipids</b>        |                           |                                                       |                                                    |                              |
| CE(18:1)                    |                           | 0.39 ± 0.35                                           | 0.26 ± 0.28                                        | 0.150                        |
| CE(22:6)                    |                           | 1.47 ± 0.89                                           | 1.45 ± 0.97                                        | 0.930                        |

<sup>a</sup> Student's *t*-test

**Supplementary Table 5: Associations between serum levels of PEp (36:4) and (40:6) with clinical characteristics in 50 HCC patients (discovery set)**

|                 | PEp (36:4) | PEp (40:6) |
|-----------------|------------|------------|
| Age             | 0.042      | 0.001      |
| Gender          | 0.019      | 0.037      |
| TNM tumor stage | -0.294*    | -0.283*    |
| AFP             | 0.330*     | 0.234      |
| ALT             | -0.168     | -0.159     |
| AST             | -0.247     | -0.184     |
| GGT             | -0.183     | -0.180     |

\*Correlation is significant at the 0.05 level.

**Supplementary Table 6: Associations between serum levels of PEp (36:4) and (40:6) with clinical characteristics in 18 HCC patients (validation set) <sup>a</sup>**

|                 | PEp (36:4) | PEp (40:6) |
|-----------------|------------|------------|
| Age             | -0.023     | 0.051      |
| Gender          | 0.043      | -0.189     |
| TNM tumor stage | -0.083     | -0.250     |
| AFP             | -0.198     | -0.120     |
| ALT             | -0.029     | -0.103     |
| AST             | -0.197     | -0.039     |
| GGT             | 0.013      | -0.044     |

<sup>a</sup> No correlation is significant at the 0.05 level.

**Supplementary Table 7: Optimized MRM conditions for PEp (36:4) and (40:6)**

| Compounds  | R. T. (min) | Transition ion (m/z) | Fragmentor voltage (V) | CE (eV) |
|------------|-------------|----------------------|------------------------|---------|
| PEp (36:4) | 7.91        | 722.5 → 436.3        | 90                     | 30      |
|            |             | 722.5 → 303.2        |                        |         |
| PEp (40:6) | 8.38        | 774.5 → 464.3        | 90                     | 30      |
|            |             | 774.5 → 327.2        |                        |         |
